# Supplementary material
Source: publisher figshare collection journal article supplement (https://acs.figshare.com/ndownloader/files/3869347)
Supplement: Supplementary file 1 [file 3869347]

## **Supporting Information**

### **Application of a Spherical Harmonics Expansion Approach for Calculating Ligand Density Distributions around Proteins**

Siddharth Parimal, Steven M. Cramer, Shekhar Garde\*

*Howard P. Isermann Department of Chemical and Biological Engineering and Center for  
Biotechnology and Interdisciplinary Studies,  
Rensselaer Polytechnic Institute, 110 8<sup>th</sup> Street, Troy, NY, 12180*

*\*Corresponding author. E-mail: [gardes@rpi.edu](mailto:gardes@rpi.edu); Phone: (518) 276-6298.*

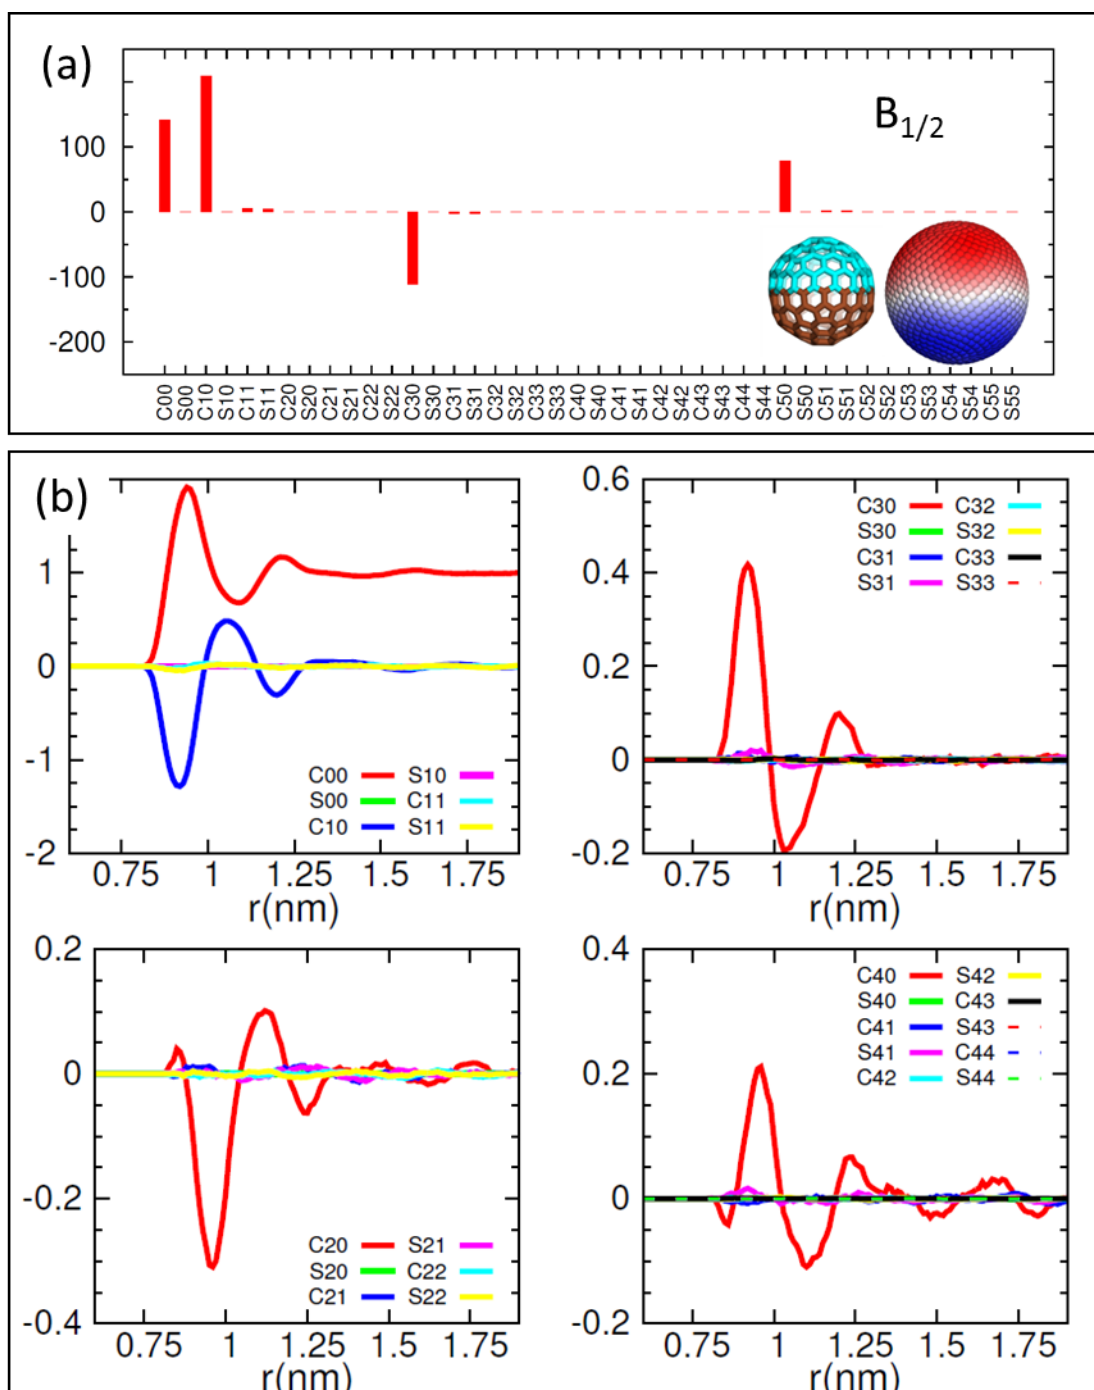

Figure S1. (a) Spherical harmonic coefficients for the hydrophilic atom distribution in  $B_{1/2}$ . (b) Spherical harmonic coefficients for the water distribution around  $B_{1/2}$ .

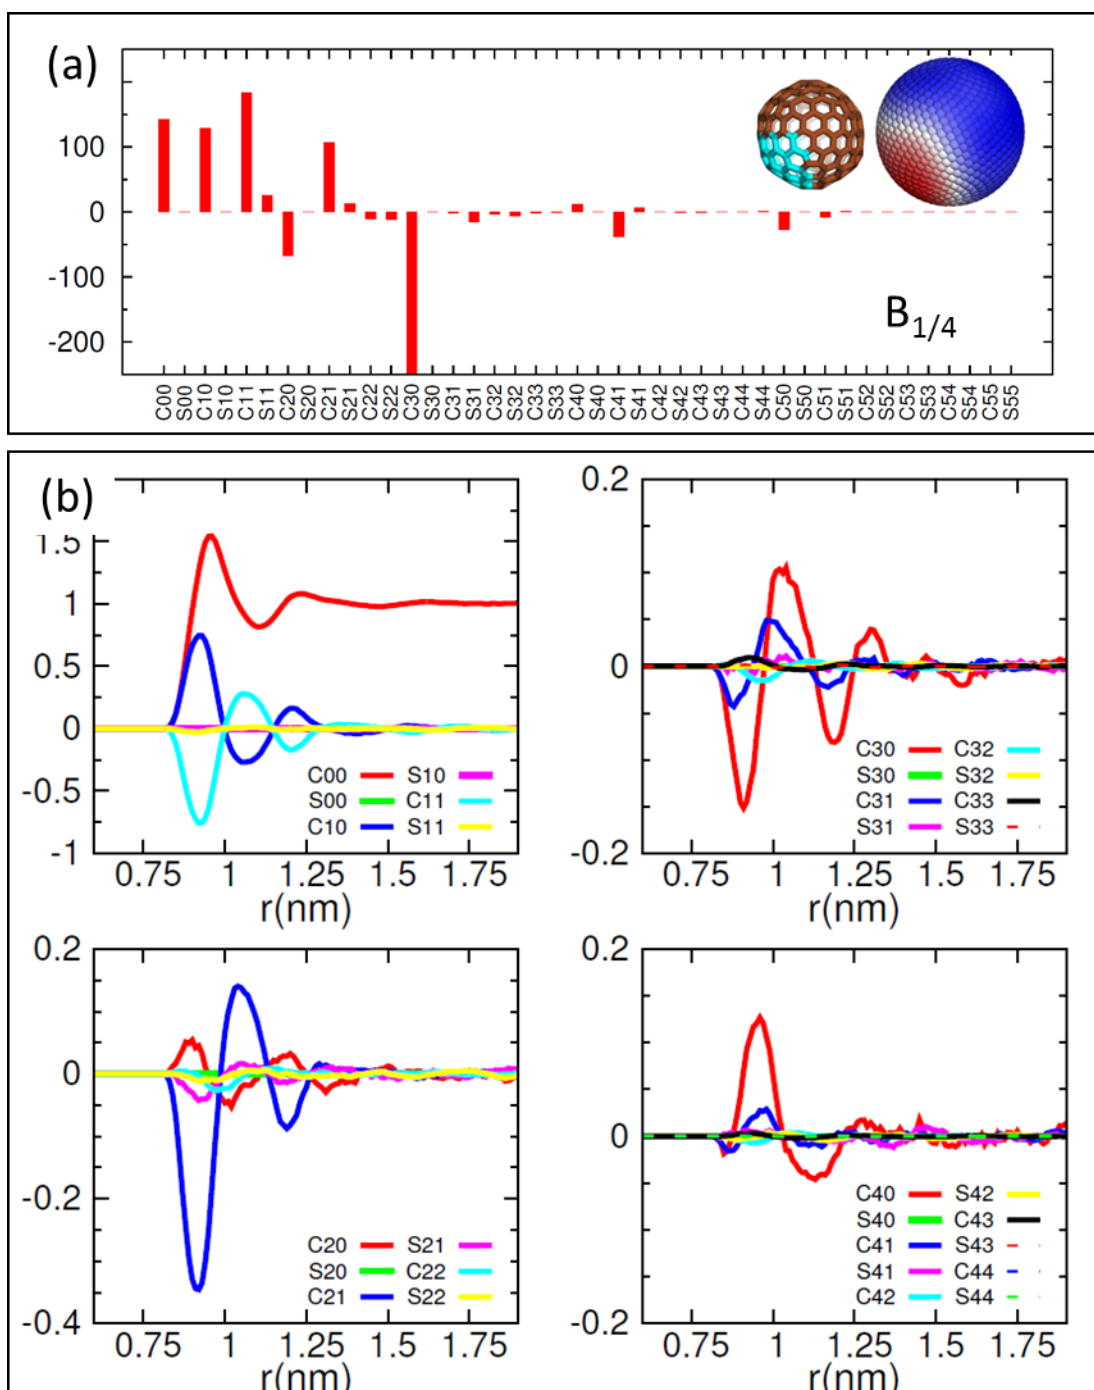

Figure S2. (a) Spherical harmonic coefficients for the hydrophilic atom distribution in  $B_{1/4}$ . (b) Spherical harmonic coefficients for the water distribution around  $B_{1/4}$ .

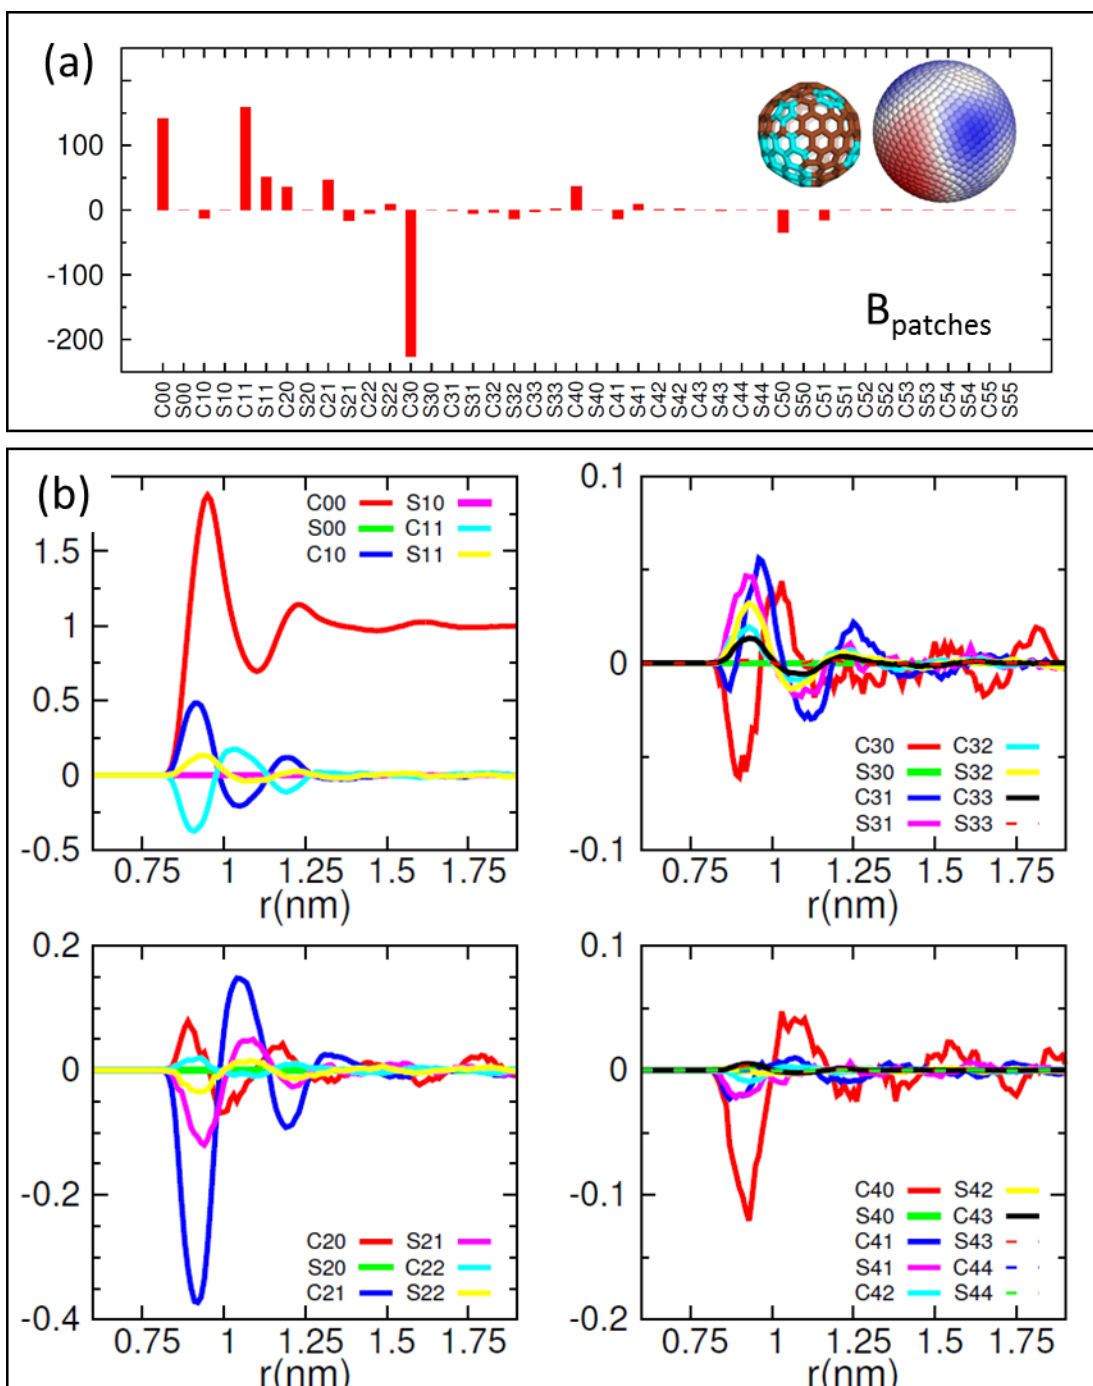

Figure S3. (a) Spherical harmonic coefficients for the hydrophilic atom distribution in  $B_{\text{patches}}$ . (b) Spherical harmonic coefficients for the water distribution around  $B_{\text{patches}}$ .

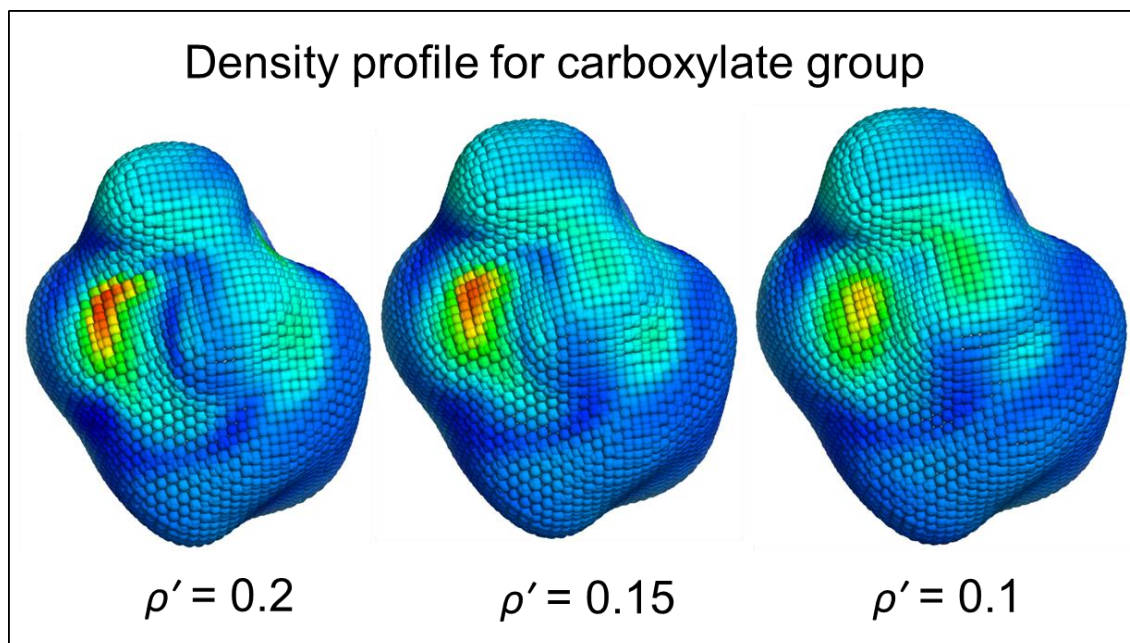

Figure S4.  $\rho/\rho_0$  values plotted for the carboxylate group of Capto MMC ligand at different interfaces around ubiquitin. Red indicates regions of high ligand density ( $\rho/\rho_0 \sim 200$ ) while blue indicates regions of low ligand density ( $\rho/\rho_0 \sim 1$ ).
